# Supplementary material for: A spectrum of routing strategies for brain networks
Source: PubMed Central journal article supplement (PMC6426276; doi:10.1371/journal.pcbi.1006833), 2019-03-08
Supplement: pcbi.1006833.s001.pdf [file pcbi.1006833.s001.pdf]

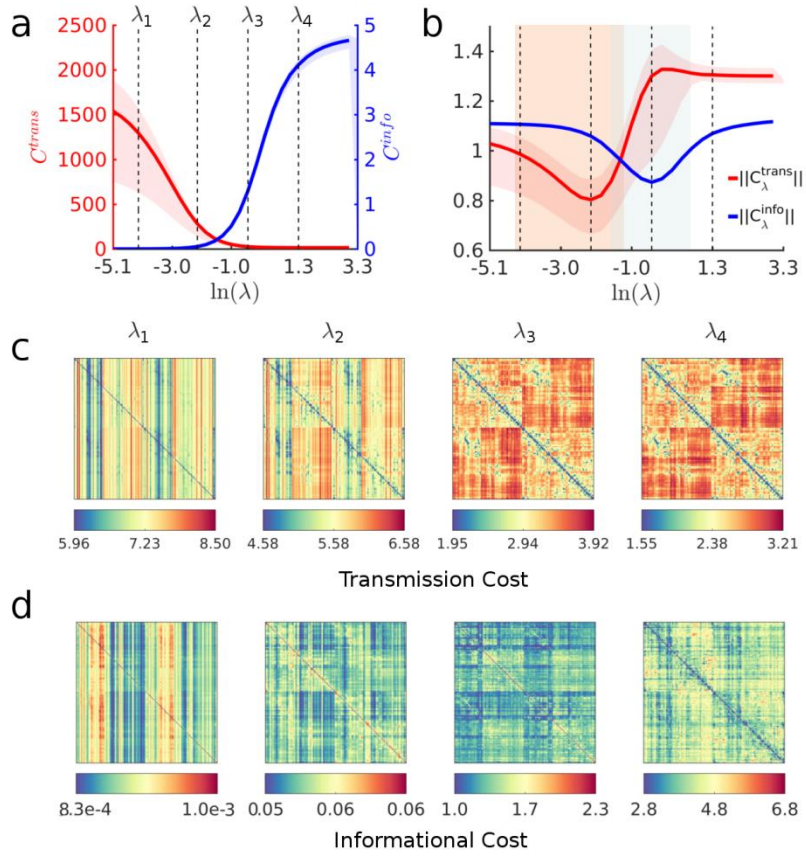

**S1 Fig. A spectrum of communication processes.** (a) Averages of  $C_{\lambda}^{trans}$  (red) and  $C_{\lambda}^{info}$  (blue) across all node pairs, as a function of  $\lambda$ . Solid red and blue lines correspond to the median across all subjects, whereas the shaded red and blue regions denote the 95<sup>th</sup> percentile. Vertical dashed lines correspond to the values  $\lambda_1=e^{-4.19}$ ,  $\lambda_2=e^{-2.16}$ ,  $\lambda_3=e^{-0.42}$  and  $\lambda_4=e^{1.31}$ . (b) Averages of  $\|C_{\lambda}^{trans}\|$  (red) and  $\|C_{\lambda}^{info}\|$  (blue) across all node pairs. These curves are computed by normalizing  $C_{\lambda}^{trans}$  and  $C_{\lambda}^{info}$  with respect to the same cost measures computed on ensembles of 500 randomized networks (per subject). Shaded red and blue areas indicate sections of the curves  $\|C_{\lambda}^{trans}\|$  and  $\|C_{\lambda}^{info}\|$  that are smaller than 1, respectively, indicating the regions in the spectrum where the communication cost of empirical networks is smaller than the cost computed on the randomized ensembles. The dashed vertical lines are placed at the minimum and maximum of  $\|C_{\lambda}^{trans}\|$  ( $\lambda_2$  and  $\lambda_3$ , respectively), and at two points near the extremes of the spectrum ( $\lambda_1$  and  $\lambda_4$ ). (c) pairwise values of  $C_{\lambda}^{trans}(i,t)$  for all node pairs. (d) pairwise values of  $C_{\lambda}^{info}(i,t)$  for all node pairs. For the panels  $\lambda_1=e^{-4.19}$ ,  $\lambda_2=e^{-2.16}$ ,  $\lambda_3=e^{-0.42}$  and  $\lambda_4=e^{1.31}$ .
