# Supplementary material for: A spectrum of routing strategies for brain networks
Source: PubMed Central journal article supplement (PMC6426276; doi:10.1371/journal.pcbi.1006833), 2019-03-08
Supplement: pcbi.1006833.s002.pdf [file pcbi.1006833.s002.pdf]

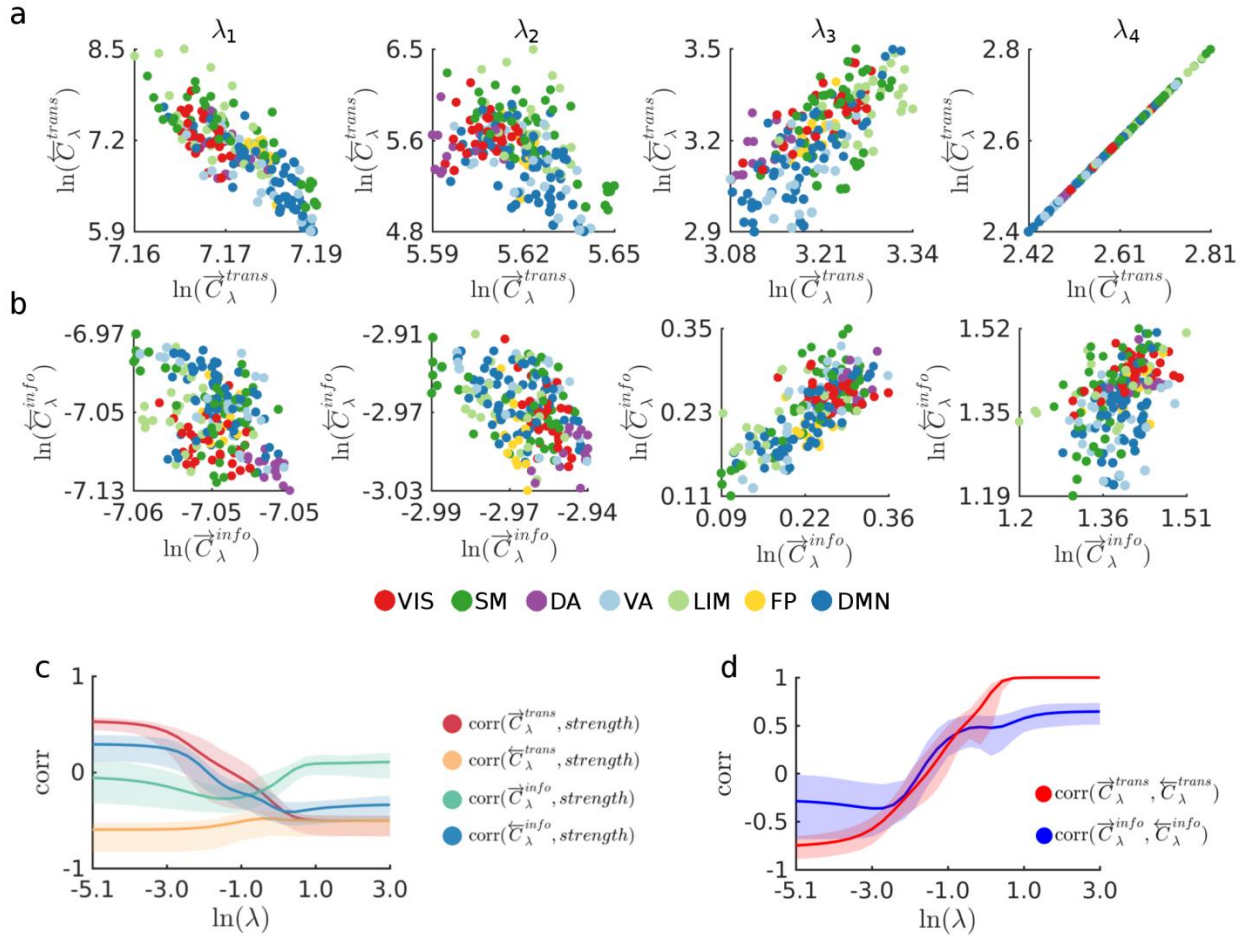

**S2 Fig. Nodal average transmission costs for four increasingly biased routing strategies.** (a) Scatter plots show the transmission cost associated to each node when it acts as source ( $\vec{C}_\lambda^{trans}$ ) and target ( $\tilde{C}_\lambda^{trans}$ ) during communication processes taking place under routing strategies generated with the values  $\lambda_1=e^{-4.19}$ ,  $\lambda_2=e^{-2.16}$ ,  $\lambda_3=e^{-0.42}$  and  $\lambda_4=e^{1.31}$ . (b) Scatter plots show the transmission cost associated to each node when it acts as source ( $\vec{C}_\lambda^{info}$ ) and target ( $\tilde{C}_\lambda^{info}$ ) during communication processes taking place under routing strategies generated with the values  $\lambda_1$ ,  $\lambda_2$ ,  $\lambda_3$  and  $\lambda_4$ . Markers in the scatter plots in (a) and (b), representing each node, are colored according to the node's functional role according to the 7 intrinsic connectivity networks (ICN) defined by Yeo et al. (2011) [71]: Visual (VIS), Somatomotor (SM), Dorsal Attention (DA), Ventral Attention (VA), Limbic (LIM), Frontal Parietal (FP), and Default Mode Network (DMN) (see Figure S11 showing ICNs projected on a cortical surface). The size of the markers is proportional to node's strength. (c) Correlations between node strength and  $\vec{C}_\lambda^{trans}$  (red),  $\tilde{C}_\lambda^{trans}$  (orange),  $\vec{C}_\lambda^{info}$  (green) and  $\tilde{C}_\lambda^{info}$  (blue) as a function of  $\lambda$ . Solid lines show median correlation across all subjects, shaded areas surrounding the lines show 95<sup>th</sup> percentile. Shaded colored areas between the vertical dashed lines indicate regions where the correlations were not significant ( $p > 0.001$ ). (d) Correlation between  $\vec{C}_\lambda^{trans}$  and  $\tilde{C}_\lambda^{trans}$  (red), and  $\vec{C}_\lambda^{info}$  and  $\tilde{C}_\lambda^{info}$  (blue), as a function of  $\lambda$ . Solid lines show medians across all subjects and shaded areas surrounding solid lines show the 95<sup>th</sup> percentile. Shaded areas between the vertical dashed lines indicate areas where correlation values were not significant ( $p > 0.001$ ).
