# Supplementary material for: A spectrum of routing strategies for brain networks
Source: PubMed Central journal article supplement (PMC6426276; doi:10.1371/journal.pcbi.1006833), 2019-03-08
Supplement: pcbi.1006833.s003.pdf [file pcbi.1006833.s003.pdf]

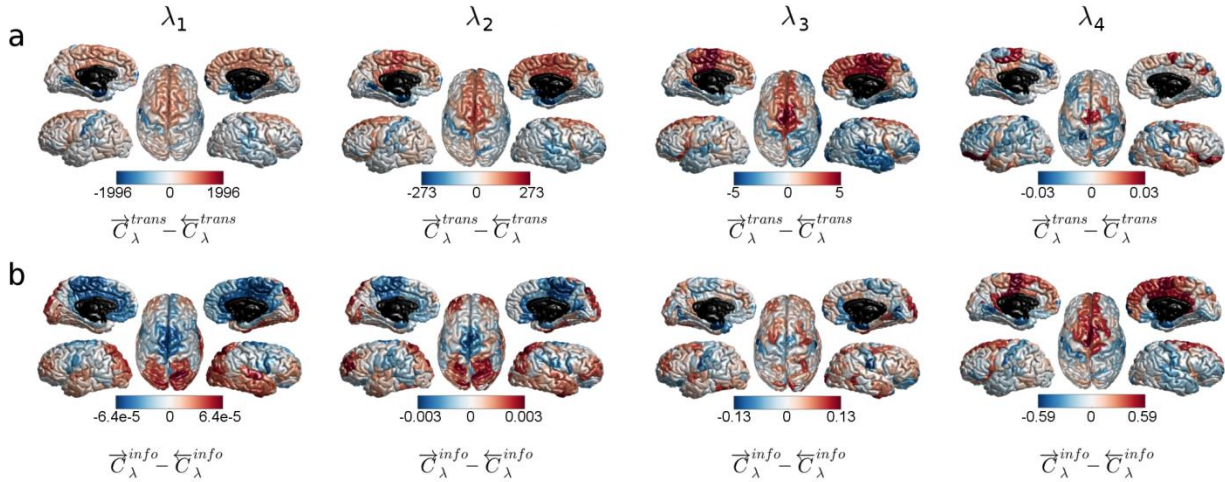

**S3 Fig. A brain region's propensity to be a costly source or target.** Cortical surfaces show the difference between a node's source and target transmission costs. (a)  $\vec{C}_\lambda^{trans} - \tilde{C}_\lambda^{trans}$  for routing strategies generated with the values  $\lambda_1$ ,  $\lambda_2$ ,  $\lambda_3$  and  $\lambda_4$ . (b)  $\vec{C}_\lambda^{info} - \tilde{C}_\lambda^{info}$  for routing strategies generated with the values  $\lambda_1$ ,  $\lambda_2$ ,  $\lambda_3$  and  $\lambda_4$ . Red colored areas on the cortical surfaces correspond to nodes whose source transmission/informational cost is higher than their target transmission/informational cost. Blue colored areas correspond to nodes whose target transmission/informational cost is higher than their source transmission/informational cost. For all panels,  $\lambda_1=e^{-4.19}$ ,  $\lambda_2=e^{-2.16}$ ,  $\lambda_3=e^{-0.42}$  and  $\lambda_4=e^{1.31}$ .
