# Supplementary material for: A spectrum of routing strategies for brain networks
Source: PubMed Central journal article supplement (PMC6426276; doi:10.1371/journal.pcbi.1006833), 2019-03-08
Supplement: pcbi.1006833.s004.pdf [file pcbi.1006833.s004.pdf]

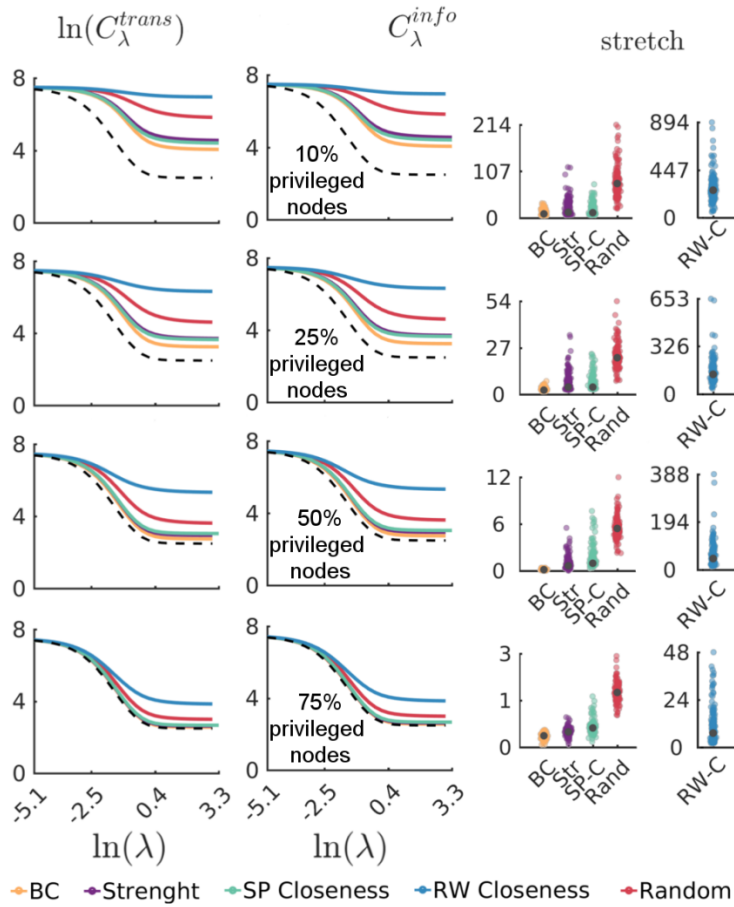

**S4 Fig. Network average values of  $C_{\lambda}^{trans}$  (left panel) and  $C_{\lambda}^{info}$  (middle panel) as a function of  $\lambda$ .** Node medians across all subjects are shown for 22, 55, 110, and 165 *privileged nodes* (corresponding to 10%, 25%, 50% and 75% of the network's nodes) that are selected according to betweenness centrality ranking (yellow line), strength ranking (purple line), shortest-path-based closeness centrality (green line), and random-walk-based closeness centrality (blue line). For comparison purposes, we also show cost measures for randomly sampled nodes (red line). The dotted lines show  $C_{\lambda}^{trans}$  and  $C_{\lambda}^{info}$ , respectively, for the case in which all nodes' routing strategies are biased (i.e. 100% privileged nodes). Right panel shows node stretch distributions for the different sets of privileged nodes and centrality rankings. Black markers indicate the median of the distributions.
