# Supplementary material for: A spectrum of routing strategies for brain networks
Source: PubMed Central journal article supplement (PMC6426276; doi:10.1371/journal.pcbi.1006833), 2019-03-08
Supplement: pcbi.1006833.s005.pdf [file pcbi.1006833.s005.pdf]

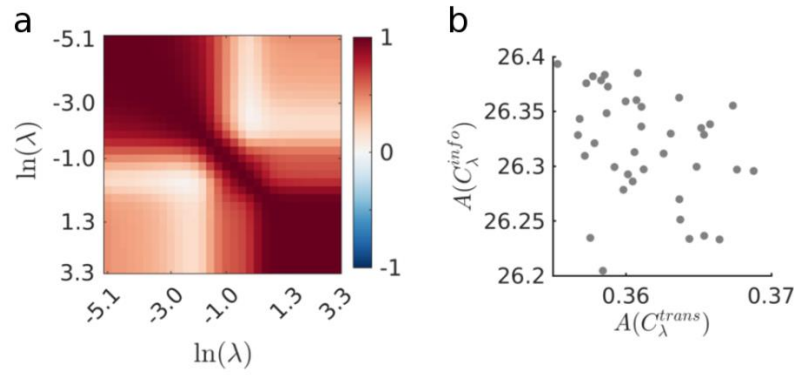

**S5 Fig. Communication cost trade-off within subjects.** (a) Correlations between all subject's  $C_\lambda^{trans}$  across all values of  $\lambda$ . Positive correlations are colored in red, negative correlations are colored in blue. (b) Scatter plot of the computed areas under the normalized  $C_\lambda^{trans}$  and  $C_\lambda^{info}$  curves, showing a trade-off between the decay of  $C_\lambda^{trans}$  and the growth of  $C_\lambda^{info}$  (correlation between  $A(C_\lambda^{trans})$  and  $A(C_\lambda^{info})$  is  $r = -0.6$ ,  $p < 0.001$ ).
