# Supplementary material for: A spectrum of routing strategies for brain networks
Source: PubMed Central journal article supplement (PMC6426276; doi:10.1371/journal.pcbi.1006833), 2019-03-08
Supplement: pcbi.1006833.s009.pdf [file pcbi.1006833.s009.pdf]

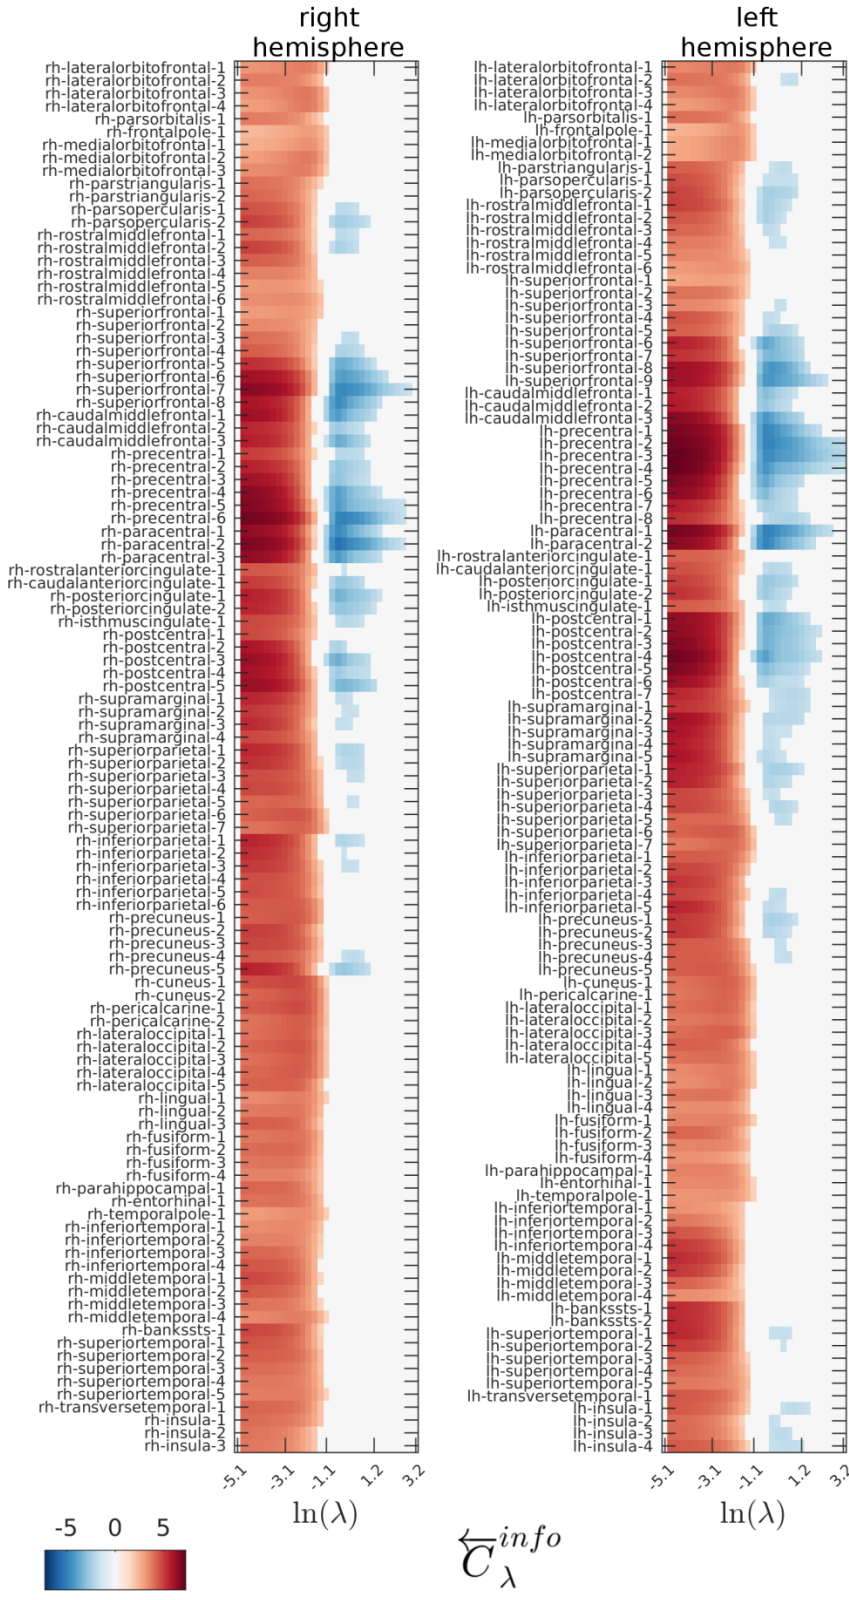

**S9 Fig. z-scored target informational costs as a function of  $\lambda$ .** For each subject's structural connectivity network, the target informational cost ( $\tilde{C}_\lambda^{info}$ ) of every node was standardized with respect to the corresponding distribution of  $\tilde{C}_\lambda^{info}$  measured on an ensemble of 500 randomized networks. z-scored values were then thresholded according to a type I error  $\alpha = 0.01$ . Red regions on the spectrum indicate nodes with significantly high  $\tilde{C}_\lambda^{info}$ , whereas blue regions on the spectrum indicate nodes with significantly low  $\tilde{C}_\lambda^{info}$ .
